# Supplementary material for: EIF2S3Y suppresses the pluripotency state and promotes the proliferation of mouse embryonic stem cells
Source: PubMed Central journal article supplement (PMC4905476; doi:10.18632/oncotarget.7187), 2016-02-04
Supplement: oncotarget-07-11321-s001.pdf [file oncotarget-07-11321-s001.pdf]

## EIF2S3Y suppresses the pluripotency state and promotes the proliferation of mouse embryonic stem cells

### Supplementary Materials

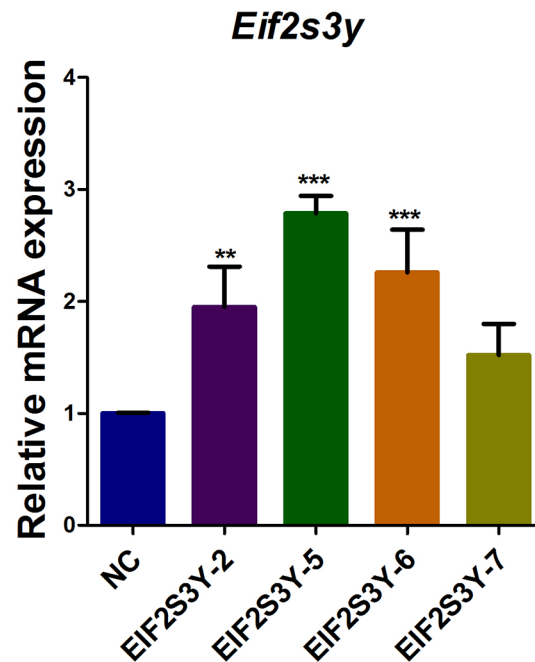

**Supplementary Figure 1:** *Eif2s3y* mRNA expression profile in ES-derived EIF2S3Y cell lines. Relative expression of *Eif2s3y* mRNA in NC, and EIF2S3Y-(2, 5, 6, 7) cell lines by qRT-PCR. ( $n = 3$  for each group, \*\* $P < 0.01$ , \*\*\* $P < 0.001$ , vs. NC).

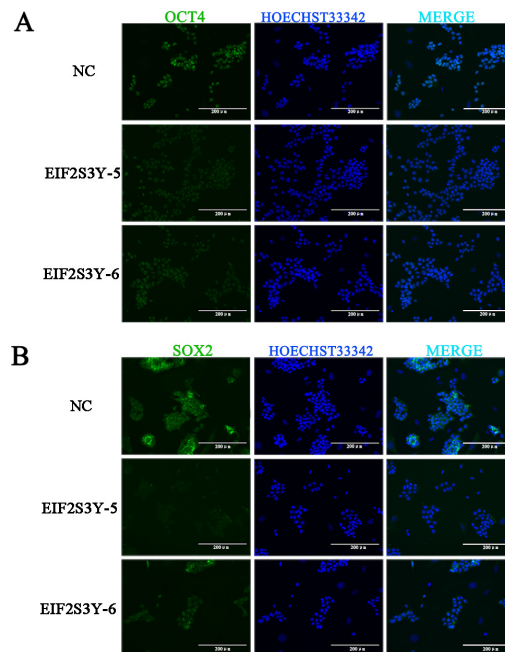

**Supplementary Figure 2:** Immunofluorescence staining of OCT4 and SOX2 in ES-derived EIF2S3Y cell lines. (A, B) Immunofluorescence staining of OCT4 (A) and SOX2 (B) (green), nucleic acids were stained with Hoechst 33342 (blue). Scale bar = 200  $\mu\text{m}$  ( $n = 3$  for each group).

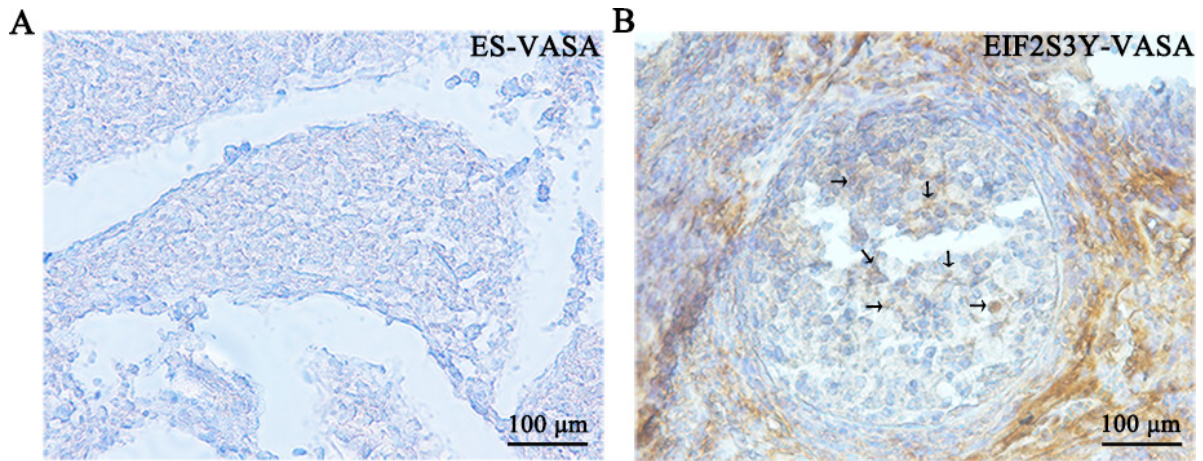

**Supplementary Figure 3: Immunohistochemistry of VASA in the testes transplanted with ES-derived cell lines.** (A) Immunohistochemistry staining of VASA in the testes that were transplanted with ES or EIF2S3Y-5 cell line. VASA positive cells were indicated with arrows. Scale bar, 100  $\mu\text{m}$  ( $n = 2$  for each group).

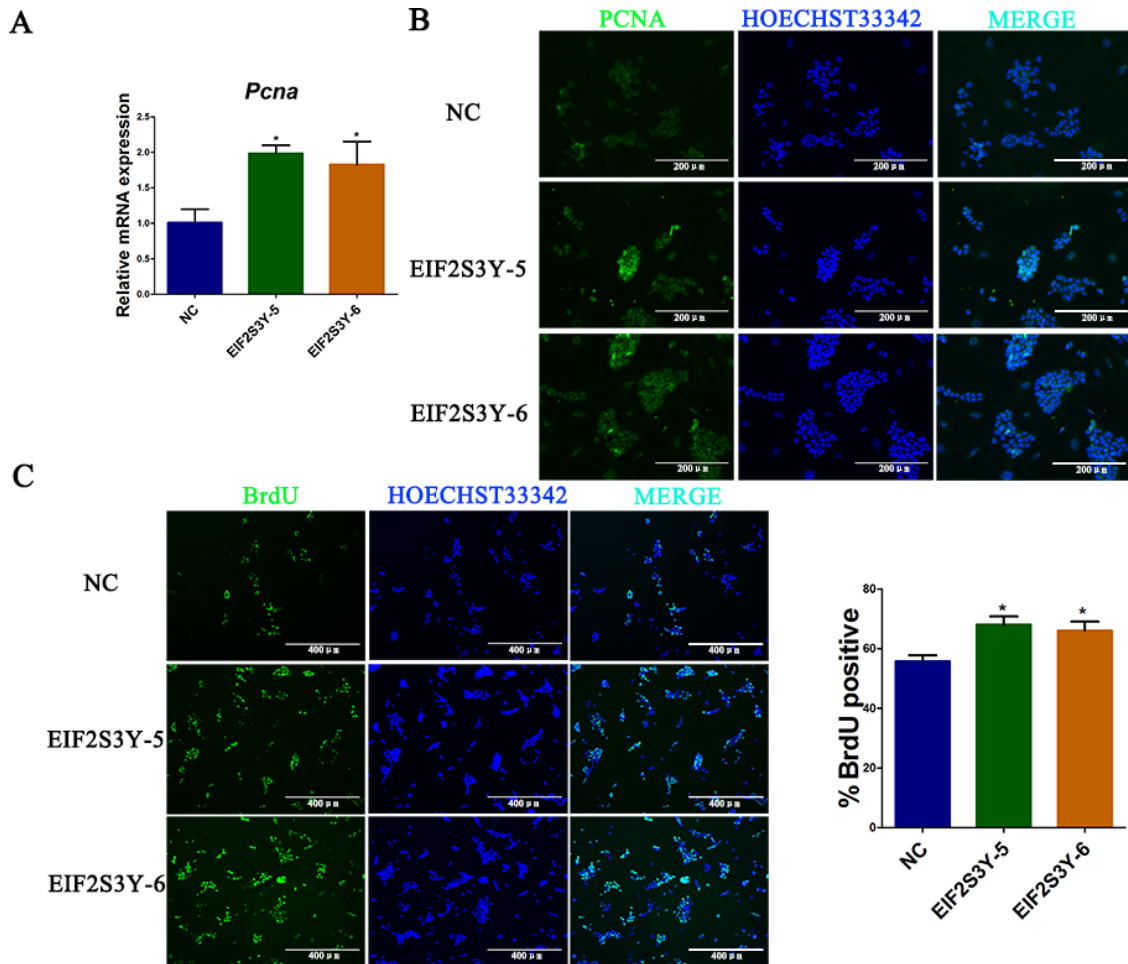

**Supplementary Figure 4: Proliferation profile of ES-derived cell lines.** (A) Relative expression of *Pcna* by qRT-PCR in NC, EIF2S3Y-5 and EIF2S3Y-6 cell lines. (B) PCNA immunofluorescence staining in NC, EIF2S3Y-5 and EIF2S3Y-6 cell lines. (C) BrdU immunofluorescence staining and percentage of BrdU-positive cells in NC, EIF2S3Y-5 and EIF2S3Y-6 cell lines. ( $n \geq 3$  for each group,  $*P < 0.05$ , vs. NC).

**Supplementary Table 1: Sequences of primers used in PCR amplification**

| Primer Sequence (5'-3') |                                |
|-------------------------|--------------------------------|
| <i>Gapdh</i>            | Fwd: TGGCCTTCCGTGTTCCCTAC      |
|                         | Rev: GAGTTGCTGTTGAAGTCGCA      |
| <i>Eif2s3y</i>          | Fwd: ATCTTGTCCTCAACCTCAGACT    |
|                         | Rev: TTCTTTAGCCTGGCTTTCTTTCA   |
| <i>Ssea-1</i>           | Fwd: ACGGATAAGGCGCTGGTACTA     |
|                         | Rev: GGAAGCCATAGGGCACGAA       |
| <i>Nanog</i>            | Fwd: TTCTTGCTTACAAGGGTCTGC     |
|                         | Rev: AGAGGAAGGGCGAGGAGA        |
| <i>Prdm1</i>            | Fwd: TGGAGGACGCTGATATGACT      |
|                         | Rev: CTTACCACGCCAATAACCTC      |
| <i>Oct-4</i>            | Fwd: GCGTTCCTCTTTGGAAAGGTGTTTC |
|                         | Rev: CTCGAACCACATCCTTCTCT      |
| <i>Sox2</i>             | Fwd: CATGAGAGCAAGTACTGGCAAG    |
|                         | Rev: CCAACGATATCAACCTGCATGG    |
| <i>Klf4</i>             | Fwd: TGGTGCTTGGTGAGTTGTGG      |
|                         | Rev: GCTCCCCCGTTTGGTACCTT      |
| <i>Pcna</i>             | Fwd: AGTGGAGAAGCTTGGAAATGGAA   |
|                         | Rev: GAGACAGTGGAGTGGCTTTTGT    |
| <i>Cylin A</i>          | Fwd: TGGCTGTGAACTACATTGA       |
|                         | Fwd: ACAAACTCTGCTACTTCTGG      |
| <i>Cylin E</i>          | Fwd: GTGGCTCCGACCTTTCAGTC      |
|                         | Fwd: CACAGTCTTGCAATCTTGGCA     |
